# Supplementary material for: Critical role of formaldehyde during methanol conversion to hydrocarbons
Source: PubMed Central journal article supplement (PMC6443648; doi:10.1038/s41467-019-09449-7), 2019-04-01
Supplement: 41467_2019_9449_MOESM1_ESM.pdf [file 41467_2019_9449_MOESM1_ESM.pdf]

# Critical role of formaldehyde during methanol conversion to hydrocarbons

Yue Liu<sup>1,‡</sup>, Felix M. Kirchberger<sup>1,‡</sup>, Sebastian Müller<sup>1</sup>, Moritz Eder<sup>1</sup>, Markus Tonigold<sup>2</sup>, Maricruz Sanchez-Sanchez<sup>1,\*</sup> and Johannes A. Lercher<sup>1,\*</sup>

<sup>1</sup>Department of Chemistry and Catalysis Research Center, Technische Universität München, Lichtenbergstr. 4, 85747 Garching, Germany

<sup>2</sup>Clariant Produkte (Deutschland) GmbH, Waldheimer Straße 13, 83052 Bruckmühl, Germany

\* *Corresponding authors: m.sanchez@tum.de, johannes.lercher@ch.tum.de*

‡ *These authors contributed equally to this work*

**Supplementary Information**

### Supplementary Method 1. Analysis of <sup>13</sup>C incorporation in gas products.

The degree of <sup>13</sup>C incorporation in gas products in MTO was determined by analyzing the MS spectra of each gas product in GC-MS. The normal procedure of analyzing the shift of the molecular ion towards m/e +1 and +2 is hardly applicable in this work because the <sup>13</sup>C incorporation is very low and the molecular ions of a few products are less abundant than fragment ions. Therefore, we used a different approach as follow:

- (1) For a certain product, we take its MS spectra and find all the fragment ions that have the same number of carbons as the molecular ion in the MS spectra.
- (2) Define and calculate “mean weight (m/e) of fragment ions” as intensity weighted fragment ion weight:

$$W_{\text{frag}} = \frac{\sum_{j=m}^n j \cdot I_j}{\sum_{j=m}^n I_j} \quad (\text{Eq. 1})$$

The  $m$  and  $n$  are the lowest m/e and highest m/e in the fragment ions mentioned in (1);  $I_j$  is the MS peak intensity of the fragment ion with m/e of  $j$ .

- (3) The unlabeled product has the mean weight of fragment ions,  $W_{\text{frag,unlabel}}$ ; the <sup>13</sup>C incorporated sample has  $W_{\text{frag,samp}}$ . Then the fraction of <sup>13</sup>C in the product,  $X_{13\text{C}}$ , is calculated by:

$$X_{13\text{C}} = \frac{W_{\text{frag,samp}} - W_{\text{frag,unlabel}}}{N} + 1.1\% \quad (\text{Eq. 2})$$

in which  $N$  is the number of carbon atoms in the product molecule; 1.1% is the natural abundance of <sup>13</sup>C.

#### The derivation of equation (2):

The product sample is a mixture of unlabeled and <sup>13</sup>C labeled molecules. It contains  $x_0$  mole of unlabeled molecule,  $x_1$  mole of one <sup>13</sup>C labeled molecule,  $x_j$  mole of  $j$  (number) <sup>13</sup>C labeled molecule, till  $x_N$  mole of  $N$  <sup>13</sup>C labeled molecule.  $N$  is the number of carbon atoms in the product molecule. The unlabeled molecule has the mean weight of fragment ions,  $W_{\text{frag,unlabel}}$ . The one <sup>13</sup>C labeled molecule has the mean weight of fragment ions,  $W_{\text{frag,unlabel}} + 1$ . The  $j$  (number) <sup>13</sup>C labeled molecule has the mean weight of fragment ions,  $W_{\text{frag,unlabel}} + j$ . Then the product sample has a mean weight of fragment ions of  $W_{\text{frag,samp}}$ .

$$W_{\text{frag,samp}} = \frac{\sum_{j=0}^N x_j (W_{\text{frag,unlabel}} + j)}{\sum_{j=0}^N x_j} = W_{\text{frag,unlabel}} + \frac{\sum_{j=0}^N x_j j}{\sum_{j=0}^N x_j} \quad (\text{Eq. 3})$$

The second term on the right in equation (3) is virtually the number of more <sup>13</sup>C atoms per product molecule compared to that in unlabeled molecule. Since each product molecule contains  $N$  number of carbon atoms, the fraction of <sup>13</sup>C in the product,  $X_{13\text{C}}$ , is thus given by equation 4. The natural abundance (1.1% <sup>13</sup>C) of unlabeled molecule is accounted.

$$X_{13\text{C}} = \frac{\sum_{j=0}^N x_j j}{\sum_{j=0}^N x_j} \cdot \frac{1}{N} + 1.1\% = \frac{W_{\text{frag,samp}} - W_{\text{frag,unlabel}}}{N} + 1.1\% \quad (\text{Eq. 4})$$

### Supplementary Method 2. Analysis of <sup>13</sup>C incorporation in cokes.

The quantification of <sup>13</sup>C fraction in cokes was carried by analyzing the generated CO<sub>2</sub> on a mass spectrometer in the temperature programmed oxidation (TPO) of cokes. With the obtained spectra, the intensity ratio of <sup>13</sup>CO<sub>2</sub> (m/e 45) to the sum of the intensity of <sup>12</sup>CO<sub>2</sub> (m/e 44) and <sup>13</sup>CO<sub>2</sub> (m/e 45) was used as the <sup>13</sup>C fraction in coke.

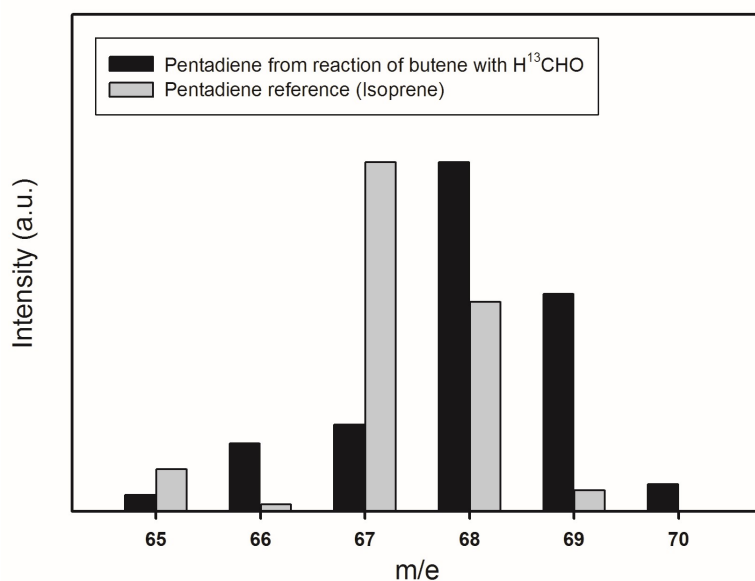

**Supplementary Figure 1 | MS of pentadiene from the reaction of butene with H<sup>13</sup>CHO.** Reaction conditions: H<sup>13</sup>CHO 3.8 mbar, butene 1.5 mbar (H<sup>13</sup>CHO/Butene 2.5/1), 35 mL/min N<sub>2</sub> flow, H-ZSM-5 (Si/Al 90 steamed) 35 mg, 475 °C, butene conversion 26%.

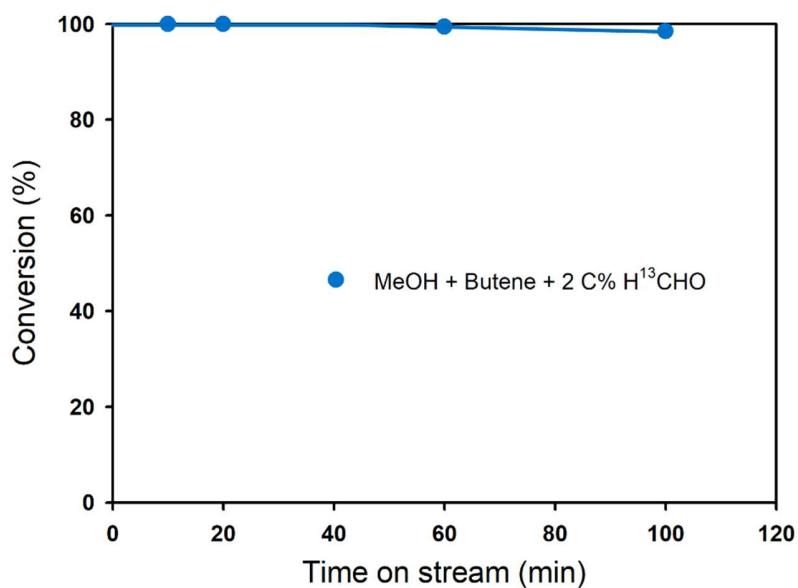

**Supplementary Figure 2 | Evolution of MeOH conversion during MTO reaction with time on stream under the feeding of MeOH, 1-butene and 2 C% H<sup>13</sup>CHO.** Reaction conditions: W/F 0.96 h·g<sub>(cat)</sub>·mol<sub>(MeOH+HCHO)</sub><sup>-1</sup>, MeOH 171 mbar, H<sup>13</sup>CHO 9 mbar, H<sub>2</sub>O 60 mbar, butene 60 mbar.
